# Supplementary material
Source: Springer Nature journal article supplement (https://www.springermedizin.de/resource/supplementary/12885_2012_3723_MOESM6_ESM.pdf/9465940)
Supplement: MOESM6 [file 9465940]

|            | p-Stage | with <i>ALK</i> fusion | <i>P</i> | without <i>ALK</i> fusion | <i>P</i> |
|------------|---------|------------------------|----------|---------------------------|----------|
| Gain       | I       | 5.05±6.07              | ] n.s.   | 4.97±6.41                 | ] 0.017  |
|            | II-IV   | 7.20±7.59              |          | -                         |          |
| Loss       | I       | 1.90±3.11              | ] n.s.   | 3.60±4.66                 | ] n.s.   |
|            | II-IV   | 3.20±2.93              |          | -                         |          |
| Gain +Loss | I       | 6.95±6.78              | ] n.s.   | 8.57±7.71                 | ] n.s.   |
|            | II-IV   | 10.4±8.09              |          | -                         |          |
